# Supplementary material
Source: PubMed Central journal article supplement (PMC3754215)
Supplement: IAI.00280-13_zii999090302so1.pdf [file IAI.00280-13_zii999090302so1.pdf]

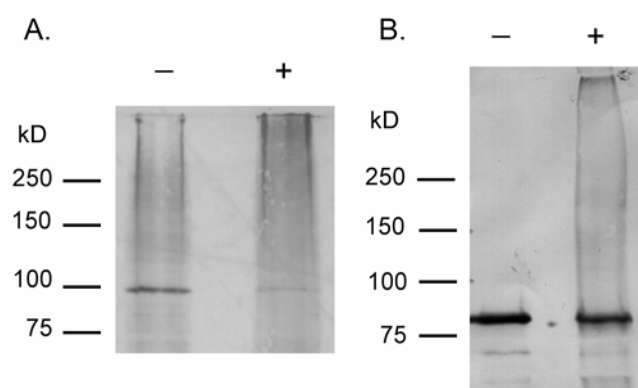

**Figure S1.** Western blots of whole cell lysates from wild-type strain FA19 grown with photoactivatable cross linkers and either exposed (+) or not exposed (-) to UV light. Identical western blots were probed with polyclonal sera against TbpA (A) and TbpB (B).
